# Supplementary material
Source: Elsevier journal article supplement (https://www.sciencedirect.com/science/article/pii/S0300893219303227)
Supplement: mmc1 [file S0300893219303227:mmc1.pdf]

## Material adicional

### Tabla 1 del material adicional

Aspectos importantes para intentar mejorar el proceso del paciente con insuficiencia cardiaca avanzada

- ¿Cómo avanzar en el conocimiento sobre el pronóstico de los pacientes con IC?
- ¿Cómo y cuándo retirar fármacos, desactivar desfibriladores implantables o dispositivos de asistencia mecánica circulatoria?
- ¿Debemos cambiar las variables duras de los ensayos clínicos en IC terminal?, ¿Cuáles deben ser?
- ¿Es posible conseguir una toma de decisiones compartida integrando las preferencias del paciente y de la familia a la de los profesionales?
- ¿Cómo mejorar la comunicación entre todos los participantes en el proceso?
- ¿Cómo se puede valorar y disminuir las cargas físicas y psicológicas en los pacientes con IC y sus familias?
- ¿Cuáles deben ser las estrategias de coordinación para mejorar la atención entre los distintos niveles asistenciales?

IC: insuficiencia cardiaca.

Modificada con permiso de Formiga et al.<sup>1</sup>.

### Tabla 2 del material adicional

Escala de sedación de Ramsay<sup>2</sup>

| Nivel | Descripción nivel de actividad                                  |
|-------|-----------------------------------------------------------------|
| 1     | Agitado, angustiado                                             |
| 2     | Tranquilo, orientado y colaborador                              |
| 3     | Respuesta a estímulos verbales                                  |
| 4     | Respuesta rápida a la presión glabellar o estímulos dolorosos   |
| 5     | Respuesta perezosa a la presión glabellar o estímulos dolorosos |
| 6     | No respuesta                                                    |

## **BIBLIOGRAFÍA**

1. Formiga F, Fariñas Balaguer O. Terminal heart failure: Continuous care is essential from the onset]. *Rev Esp Geriatr Gerontol*. 2019;54:2-4.
2. Ramsay MA, Savege TM, Simpson BR, Goodwin R. Controlled sedation with alphaxalone-alphadolone. *Br Med J*. 1974;2:656-659.
